# Supplementary material for: Combined Radionuclide Therapy and Immunotherapy for Treatment of Triple Negative Breast Cancer
Source: MDPI journal article supplement (doi:10.3390/ijms22094843), 2021-05-03
Supplement: s1 [file s1]

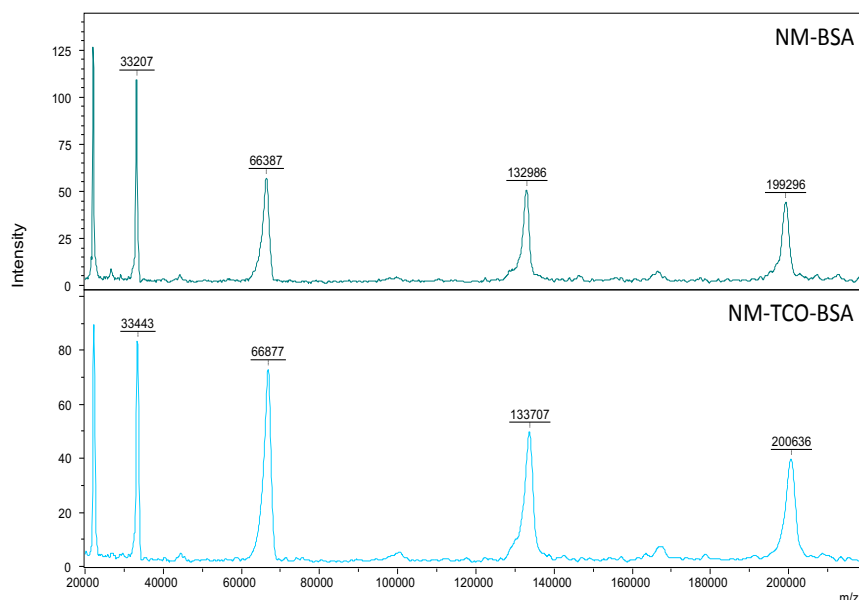

**Figure S1.** MALDI-MS confirms conjugation of TCO to BSA. BSA (top spectrum) was conjugated with TCO (bottom spectrum) and analyzed via MALDI-MS, indicating an average of 3.2 TCO groups per BSA.

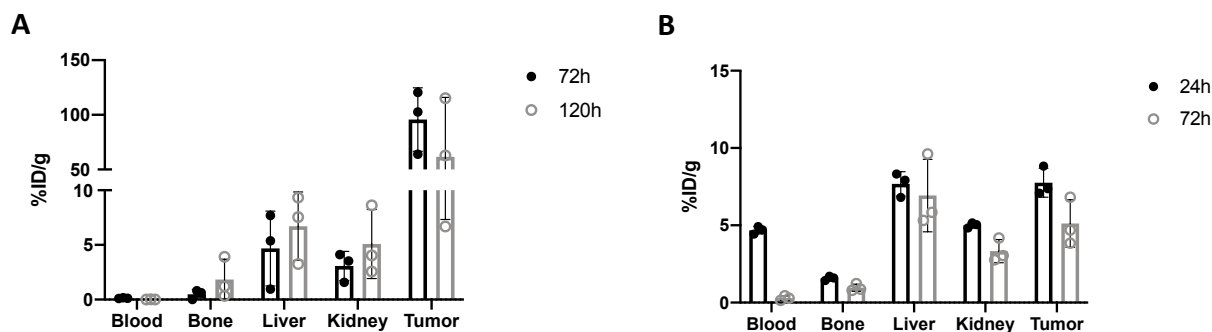

**Figure S2.** Biodistribution studies show retention of RT in the tumor with intratumoral administration. (A) Balb/c mice bearing subcutaneous 4T1 tumors were administered 0.22 MBq (SD  $\pm$  0.16 MBq) intratumorally. Groups of mice (n = 3) were sacrificed 72 and 120 h after treatment, and tissues were harvested to assess tumor retention and uptake in non-target tissues. (B) Balb/c mice bearing subcutaneous 4T1 tumors were administered 0.22 MBq (SD  $\pm$  0.16 MBq) intravenously. Groups of mice (n = 3) were sacrificed 24 and 72 h after treatment, and tissues were harvested to assess tumor retention and uptake in non-target tissues.

**Table S1.** Biodistribution studies, intratumoral administration. %ID/g values for the complete tissue list for each mouse (n = 3 per timepoint).

| Tissue   | 72 h |      |      |      | 120 h |      |
|----------|------|------|------|------|-------|------|
| Blood    | 0.18 | 0.12 | 0.10 | 0.01 | 0.03  | 0.01 |
| Adipose  | 0.00 | 0.58 | 0.55 | 0.71 | 1.21  | 0.45 |
| Adrenals | 0.00 | 0.97 | 0.83 | 2.32 | 3.18  | 0.87 |
| Bone     | 0.00 | 0.63 | 0.82 | 1.22 | 3.92  | 0.34 |
| Brain    | 0.00 | 0.02 | 0.01 | 0.01 | 0.12  | 0.04 |

|                          |       |        |        |      |        |       |
|--------------------------|-------|--------|--------|------|--------|-------|
| Gall Bladder             | 0.00  | 1.88   | 0.00   | 6.82 | 6.99   | 0.60  |
| Heart                    | 0.00  | 0.73   | 1.02   | 1.37 | 1.40   | 0.34  |
| Kidneys                  | 1.58  | 3.53   | 4.11   | 4.05 | 8.63   | 2.56  |
| Large Intestine + Caecum | 0.26  | 0.47   | 0.60   | 0.50 | 0.75   | 0.32  |
| Liver                    | 0.96  | 5.37   | 7.70   | 7.55 | 9.34   | 3.25  |
| Lungs                    | 0.00  | 0.61   | 1.03   | 0.84 | 1.08   | 0.21  |
| Pancreas                 | 0.00  | 0.66   | 0.90   | 0.87 | 1.02   | 0.23  |
| Skeletal Muscle          | 0.00  | 0.39   | 0.55   | 6.46 | 18.85  | 0.25  |
| Small Intestine          | 0.19  | 0.35   | 0.49   | 0.41 | 0.55   | 0.11  |
| Spleen                   | 0.00  | 2.27   | 3.46   | 2.57 | 3.69   | 0.70  |
| Stomach                  | 0.32  | 0.26   | 0.45   | 0.64 | 0.48   | 0.14  |
| Thyroid/Trachea          | 0.00  | 0.67   | 1.17   | 0.69 | 1.23   | 1.08  |
| Tumor                    | 63.95 | 102.63 | 120.56 | 6.69 | 115.25 | 62.89 |
| Urine + Bladder          | 2.18  | 8.79   | 0.94   | 4.68 | 11.09  | 2.60  |

**Table S2.** Biodistribution studies, intravenous administration. %ID/g values for the complete tissue list for each mouse (n = 3 per timepoint).

| <b>Tissue</b>            | <b>24 h</b> |      |      |      | <b>72 h</b> |      |
|--------------------------|-------------|------|------|------|-------------|------|
| Blood                    | 4.70        | 4.92 | 4.43 | 0.44 | 0.15        | 0.28 |
| Adipose                  | 1.24        | 1.63 | 1.31 | 0.84 | 1.05        | 1.23 |
| Adrenals                 | 5.65        | 3.58 | 4.69 | 2.75 | 2.29        | 3.79 |
| Bone                     | 1.70        | 1.59 | 1.43 | 0.87 | 0.79        | 1.23 |
| Brain                    | 0.09        | 0.09 | 0.09 | 0.02 | 0.02        | 0.02 |
| Gall Bladder             | 5.67        | 2.36 | 9.61 | 0.92 | 1.43        | 5.33 |
| Heart                    | 2.68        | 2.27 | 2.93 | 1.40 | 1.18        | 1.93 |
| Kidneys                  | 4.83        | 5.04 | 5.15 | 2.77 | 3.05        | 4.18 |
| Large Intestine + Caecum | 1.14        | 0.97 | 1.01 | 0.66 | 0.44        | 1.00 |
| Liver                    | 7.92        | 6.80 | 8.32 | 5.85 | 5.32        | 9.62 |
| Lungs                    | 2.30        | 1.93 | 2.70 | 0.87 | 0.71        | 1.30 |
| Pancreas                 | 2.74        | 1.22 | 1.50 | 0.87 | 0.82        | 1.27 |
| Skeletal Muscle          | 0.91        | 1.27 | 0.96 | 0.39 | 0.67        | 0.66 |
| Small Intestine          | 1.17        | 0.84 | 0.99 | 0.44 | 0.31        | 0.62 |
| Spleen                   | 5.74        | 4.32 | 4.77 | 2.68 | 1.97        | 4.33 |
| Stomach                  | 0.72        | 0.64 | 0.68 | 0.41 | 0.39        | 0.76 |
| Thyroid/Trachea          | 1.84        | 2.00 | 2.24 | 0.79 | 1.05        | 1.35 |
| Tumor                    | 7.08        | 8.83 | 7.37 | 3.84 | 4.69        | 6.82 |
| Urine + Bladder          | 4.96        | 2.95 | 5.12 | 3.75 | 3.30        | 1.76 |

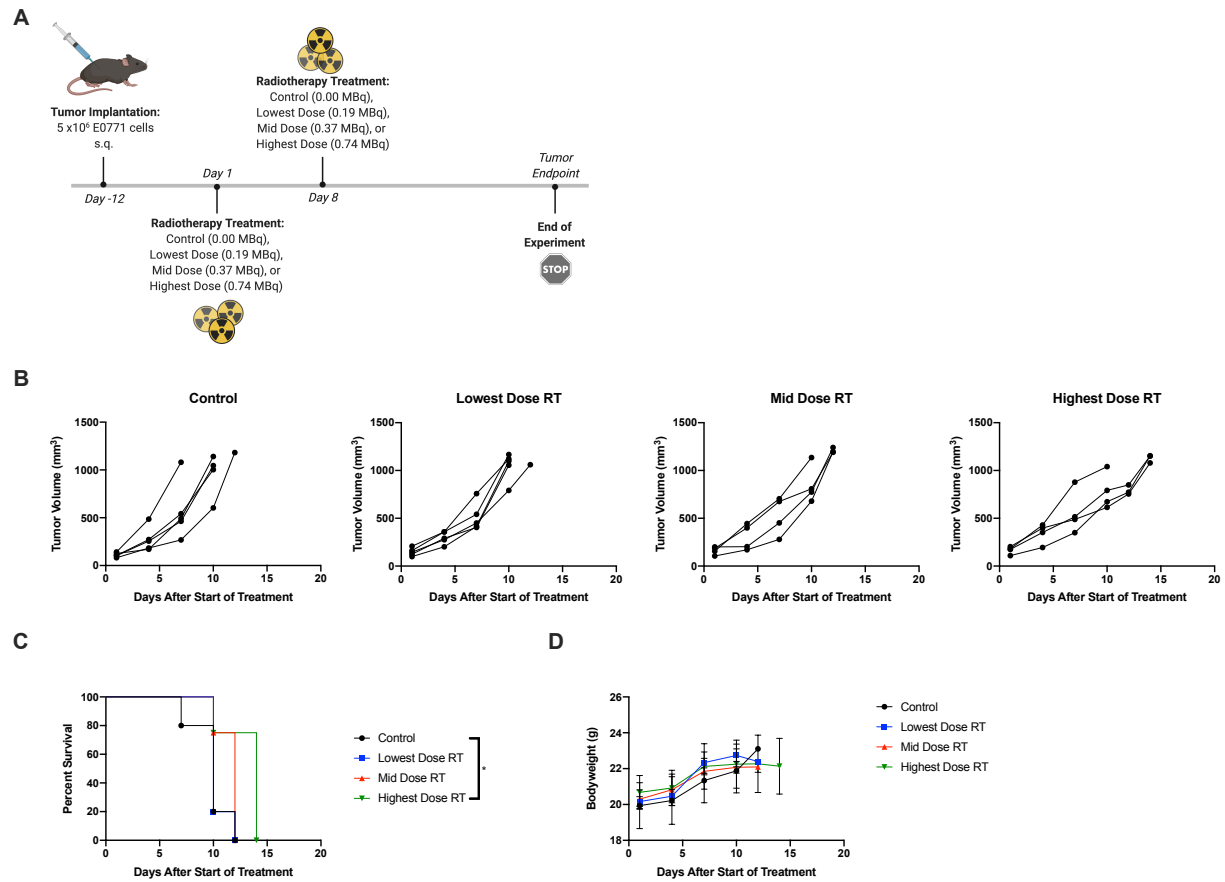

**Figure S3.** Preliminary dose optimization studies for RT regimens. **(A)** C57/Bl6 mice bearing E0771 tumors were treated with control, lowest dose RT, mid dose RT, or highest dose RT. Each treatment schedule outlines a separate experiment. **(B)** Tumor volumes were measured every 2–3 days from the start of treatment until mice reached endpoint. Each line represents an individual mouse within the group. **(C)** Kaplan–Meier survival curves of each group. **(D)** Average bodyweights for all groups.

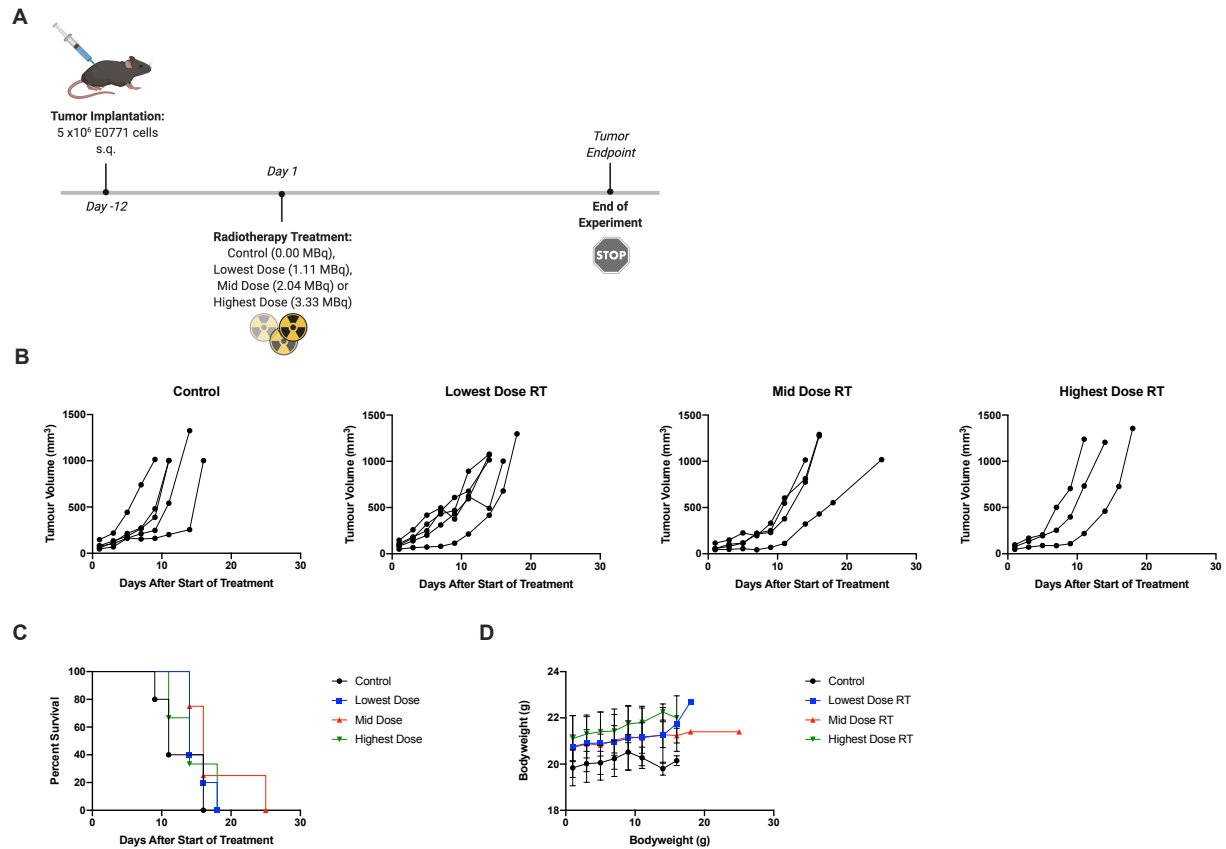

**Figure S4.** Dose optimization studies for RT regimens. **(A)** C57/Bl6 mice bearing E0771 tumors were treated with control, lowest dose RT, mid dose RT, or highest dose RT. Each treatment schedule outlines a separate experiment. **(B)** Tumor volumes were measured every 2–3 days from the start of treatment until mice reached endpoint. Each line represents an individual mouse within the group. **(C)** Kaplan–Meier survival curves of each group. **(D)** Average bodyweights for all groups.
